# Supplementary material
Source: PubMed Central journal article supplement (PMC7611703)
Supplement: EMS135040-supplement-Table_S2.pdf [file EMS135040-supplement-Table_S2.pdf]

Supplementary table 2. Multivariable test of wGII and centrality, adjusted by tumour size, pathological grade and tumour purity using linear mixed-effects model, with patients as the random control. The multivariable linear model was built using R package “nlme”, and the codes are:

```
lme(wgii~Centrality+TumourPurity+Grade+Size,data=df_lme,random=~1|Pt_ID).
```

|                    | T-value | P-value |
|--------------------|---------|---------|
| Centrality         | 1.985   | 0.048   |
| Tumour size        | 2.748   | 0.009   |
| Pathological grade | 6.039   | <0.001  |
| Tumour purity      | -1.068  | 0.286   |
